# Supplementary figures and images for: Retracted Article: Melatonin protects spinal cord injury by up-regulating IGFBP3 through the improvement of microcirculation in a rat model
Source: Royal Society of Chemistry journal article supplement (doi:10.1039/c9ra04591k), 2019-01-01

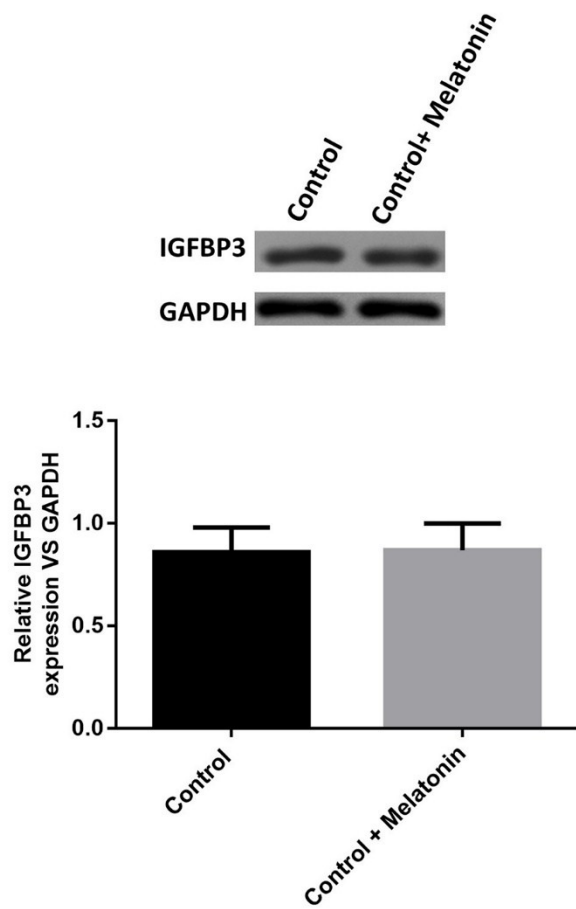

Figure S1

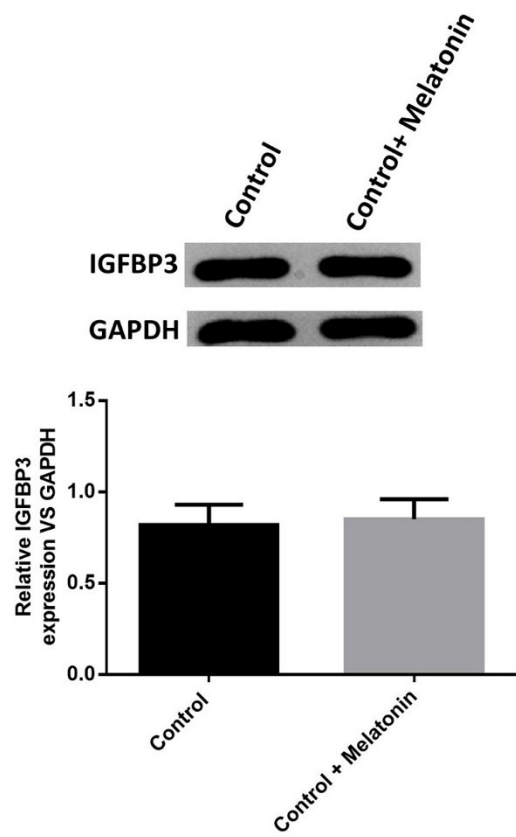

Figure S2

Supplement: c9ra04591k1.pdf [file c9ra04591k1.pdf]
